# Supplementary material for: Triple-Helical DNA in Drosophila Heterochromatin
Source: MDPI journal article supplement (doi:10.3390/cells7120227), 2018-11-23
Supplement: s1 [file s1]

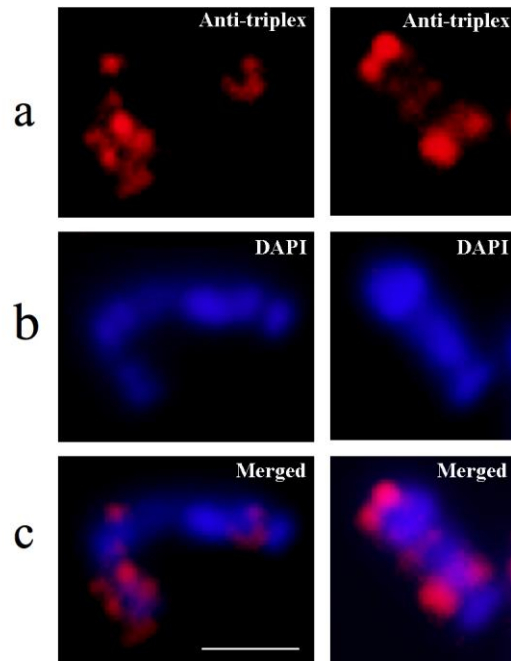

**Figure S1.** Specific regions in the Y chromosome of *D. melanogaster* are stained by anti-triplex antibodies. Antibody labelling in neuroblast chromosomes (**a**, **anti-triplex**). DAPI staining (**b**, **DAPI**) and the corresponding merged signals (**c**, **Merged**). Scale bar corresponds to 5  $\mu\text{m}$ .

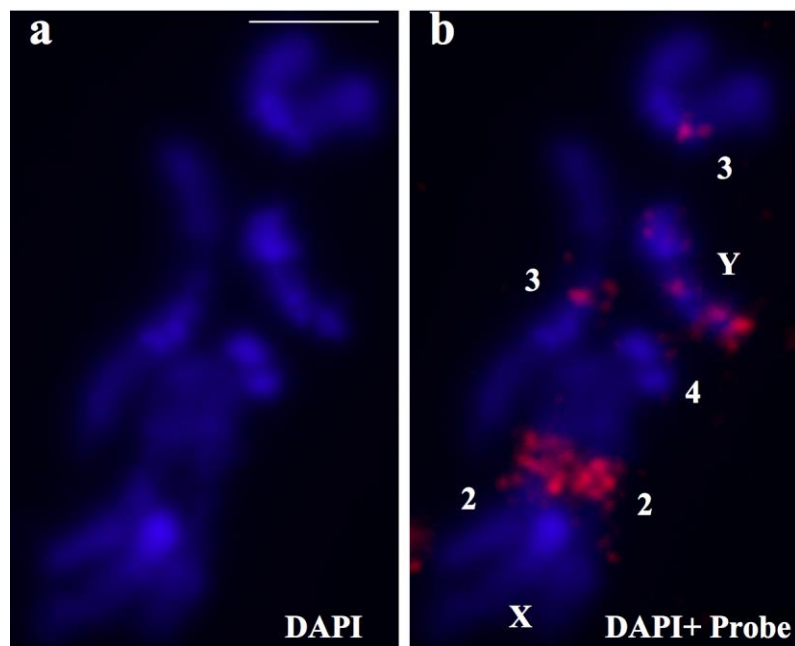

**Figure S2.** Localisation of AAGAG repeats in mitotic chromosomes of *D. melanogaster*. *In situ* hybridisation was performed with neuroblast chromosomes. Chromosomal DNA stained with DAPI (**a**, **DAPI**), satellite probe labelling (red signal) and DAPI staining superimposed (**b**, **DAPI+ probe**). Chromosomes appear identified (2, 3, 4, X, Y). Scale bar corresponds to 5  $\mu\text{m}$ .



shown. AAGAG probe labeling (**a**, **Satellite**), chromosomal DNA staining (**b**, **DAPI**) and the corresponding merged signals (**c**, **Merged**).

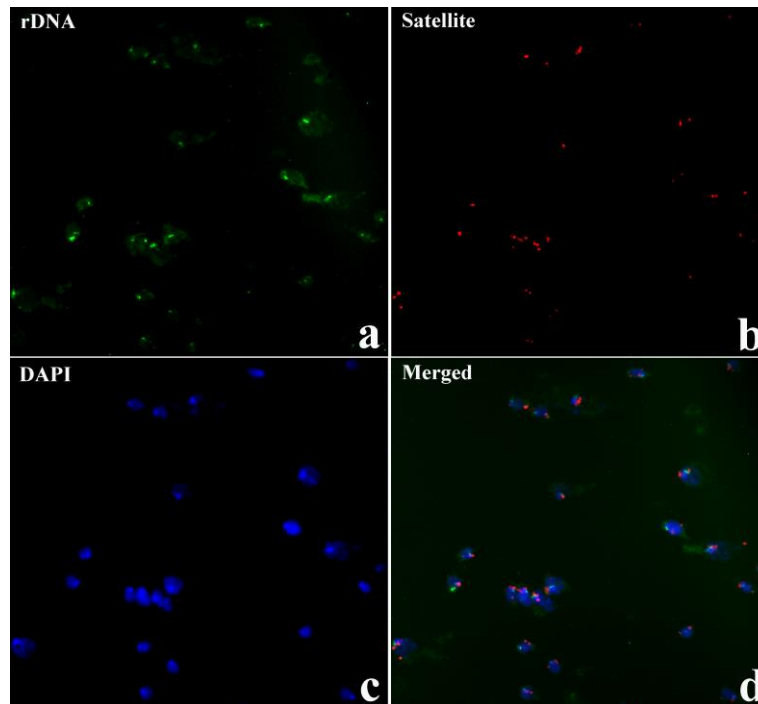

**Figure S6.** Ribosomal DNA and AAGAG probe hybridisation to *Drosophila* neuroblast nuclei carrying the *bw<sup>D</sup>* allele prepared in pH 7.0 after denaturing chromosomal DNA. Ribosomal DNA probe labelling (**a**, **rDNA**), AAGAG probe labelling (**b**, **Satellite**), nuclei stained with DAPI (**c**, **DAPI**) and the corresponding merged signals (**d**, **Merged**).
